# Supplementary material
Source: PubMed Central journal article supplement (PMC5074646)
Supplement: supp_pp.16.00891_PP2016-00891DR1_Supplemental_Material.pdf [file supp_pp.16.00891_PP2016-00891DR1_Supplemental_Material.pdf]

---

1       **The DELLA-CO cascade integrates GA and photoperiod signaling to**  
2                                   **regulate flowering in *Arabidopsis***

3       Houping Wang, Jinjin Pan, Yang Li, Dengji Lou, Yanru Hu, and Diqui Yu

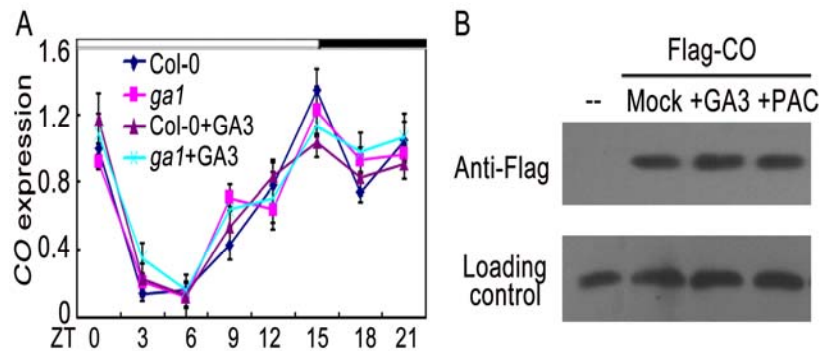

7  
8       **Supplemental figure 1.** CO transcription and protein abundance are not  
9       regulated by GA pathway. (A) qRT-PCR analysis of *CO* expression in response  
10      to GA3 in *ga1* mutant and wild type (Col-0) under LDs. (B) Western blot  
11      analysis of CO protein accumulation in tobacco leaves. Flag-fused CO was  
12      transiently expressed in tobacco leaves. Infected leaves were treated with  
13      diluted ethanol (Mock), 10  $\mu$ M GA, and 10  $\mu$ M paclobutrazol 40h after  
14      infiltration. After 8 hours, those leaves were homogenized in extraction buffer,  
15      and Flag-CO was detected using an anti-Flag antibody.

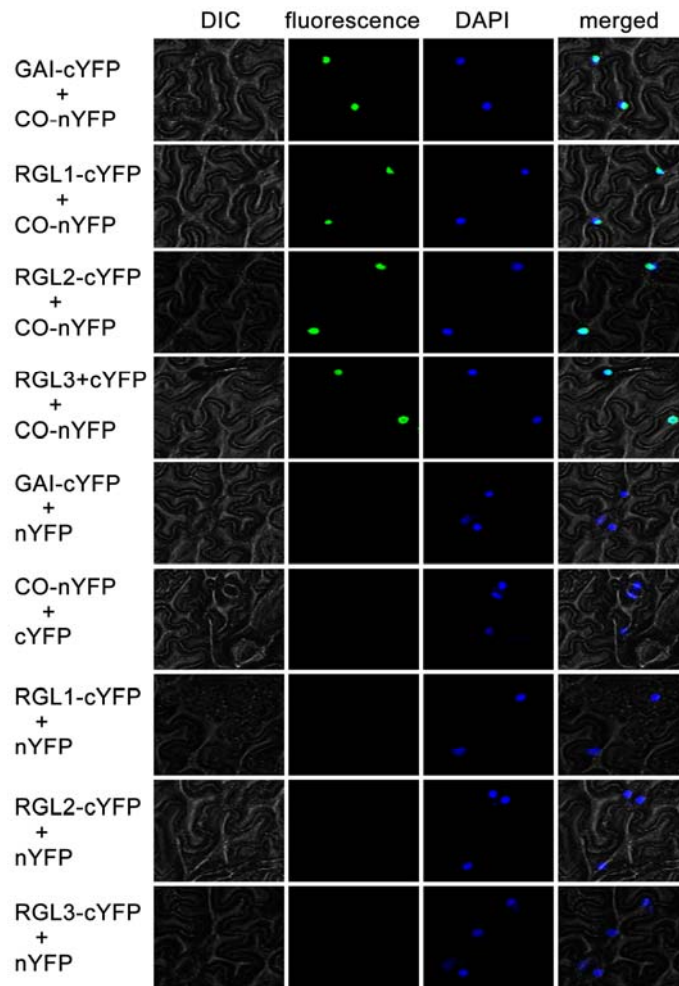

25

26 **Supplemental figure 2.** BiFC assay showing the fluorescence  
27 complementations of the cYFP fused with DELLAs and the nYFP fused with  
28 CO. 4',6-diamidino-2-phenylindole (DAPI) staining marks the nucleus.

29

30

31

32

33

34

35

36

37

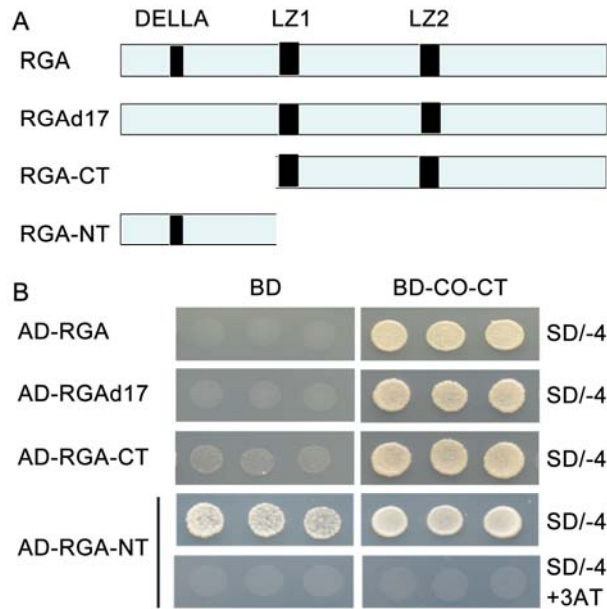

38

39 **Supplemental figure 3.** C-terminal parts of RGA contribute to the interaction  
40 between RGA and CO. (A) Schematic diagram of the constructs used in yeast  
41 two-hybrid assays in (B). (B) Interactions were indicated by the ability of cells  
42 to grow on selective media lacking Leu/Trp/His/Ade (SD/-4) or grow on  
43 selective media lacking containing 10 mM 3-aminotriazole (3AT). The empty  
44 pGBKT7 vector (BD) was used as a negative control.

45

46

47

48

49

50

51

52

53

54

55

56

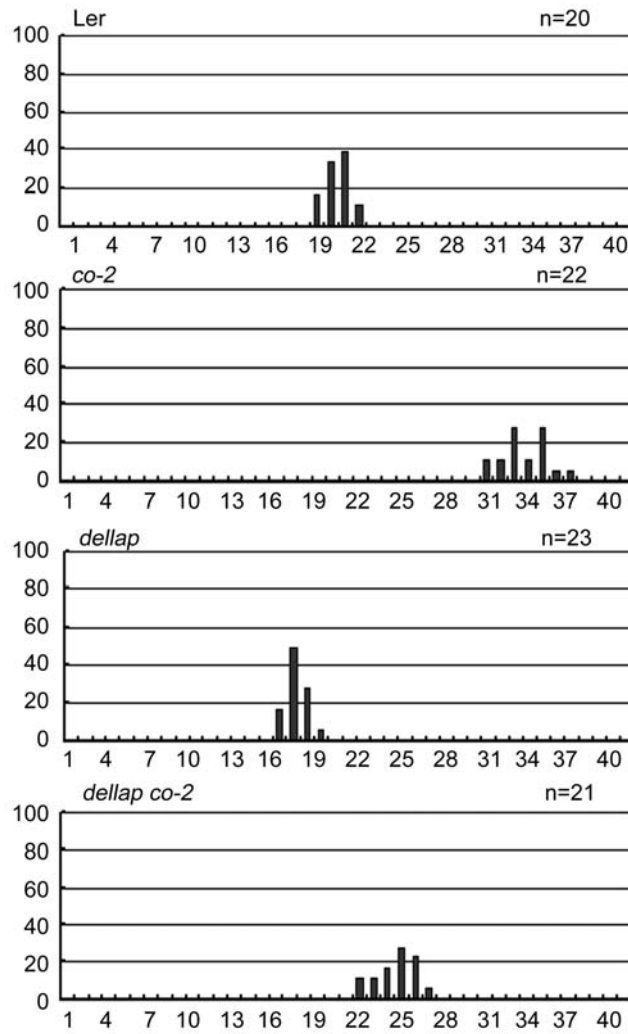

58

59 **Supplemental figure 4.** Flowering time of Ler, *co-2*, *dellap*, and *dellapco-2*

60 under LDs. The x axis indicates the number of days. The y axis indicates the

61 percentage of plants that flower with a given of days.

62

63

64

65

66

67

68

69

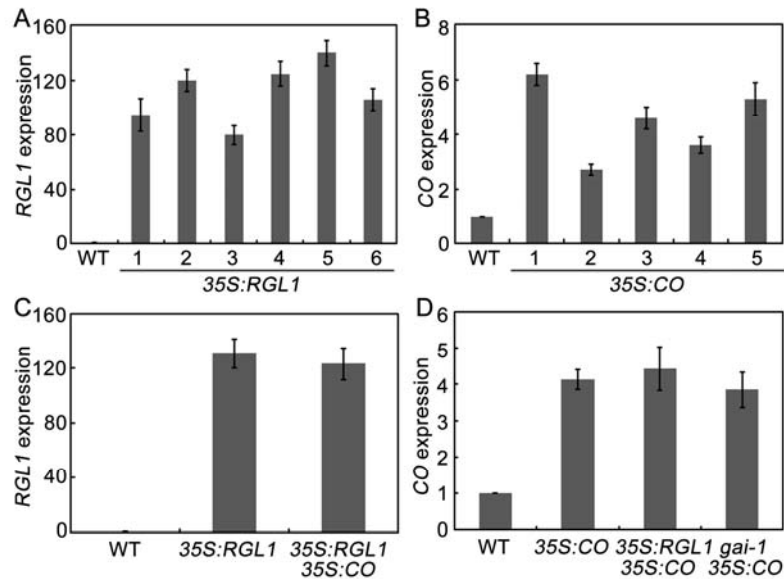

71

72 **Supplemental figure 5.** Overexpression lines for *RGL1* and *CO*. (A) Analysis  
 73 of *RGL1* expression levels in wild type (WT) and *35S:RGL1* transgenic plants.  
 74 (B) Analysis of *CO* expression levels in WT and *35S:CO* transgenic plants.  
 75 (C) Analysis of *RGL1* expression levels in WT, *35S:RGL1*, and *35S:RGL1*  
 76 *35S:CO* transgenic plants. (D) Analysis of *CO* expression levels in WT,  
 77 *35S:CO*, *35S:RGL1 35S:CO*, and *gai-1 35S:CO* transgenic plants. The  
 78 *ACTIN2* gene was used as an internal control. Total RNA was extracted from  
 79 10-d-old plants at ZT 16 grown under LD. Error bars indicate SD from three  
 80 independent RNA extracts.

81

82

83

84

85

86

87

88

89

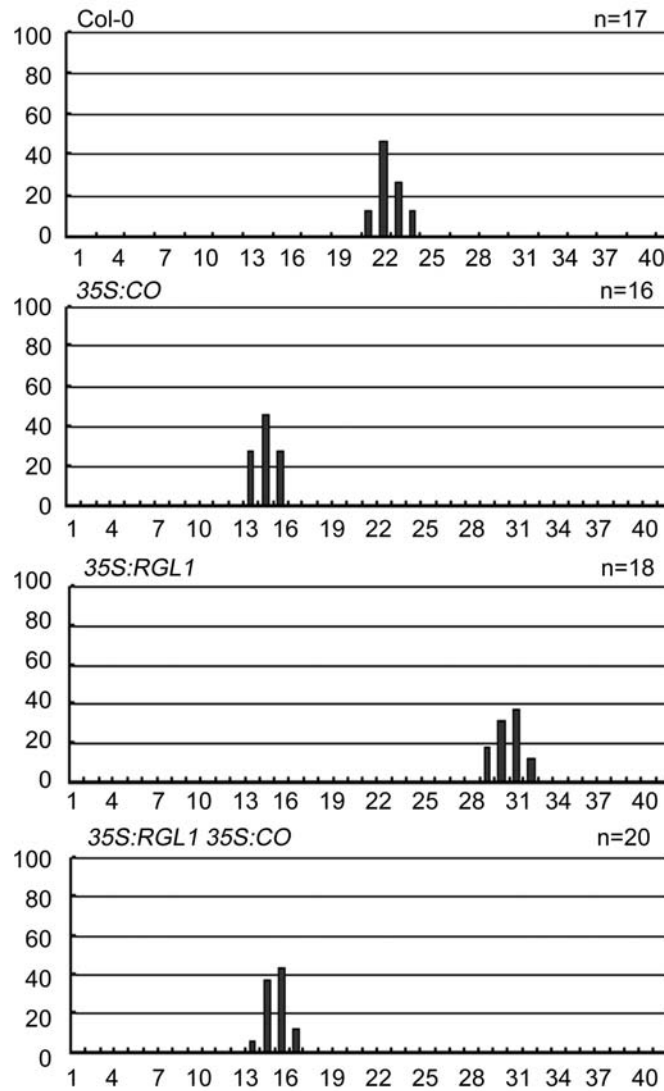

91

92 **Supplemental figure 6.** Flowering time of Col-0, 35S:CO, 35S:RGL1, and

93 35S:CO 35S:RGL1 plants under LDs. The x axis indicates the number of days.

94 The y axis indicates the percentage of plants that flower with a given of days.

95

96

97

98

99

100

101

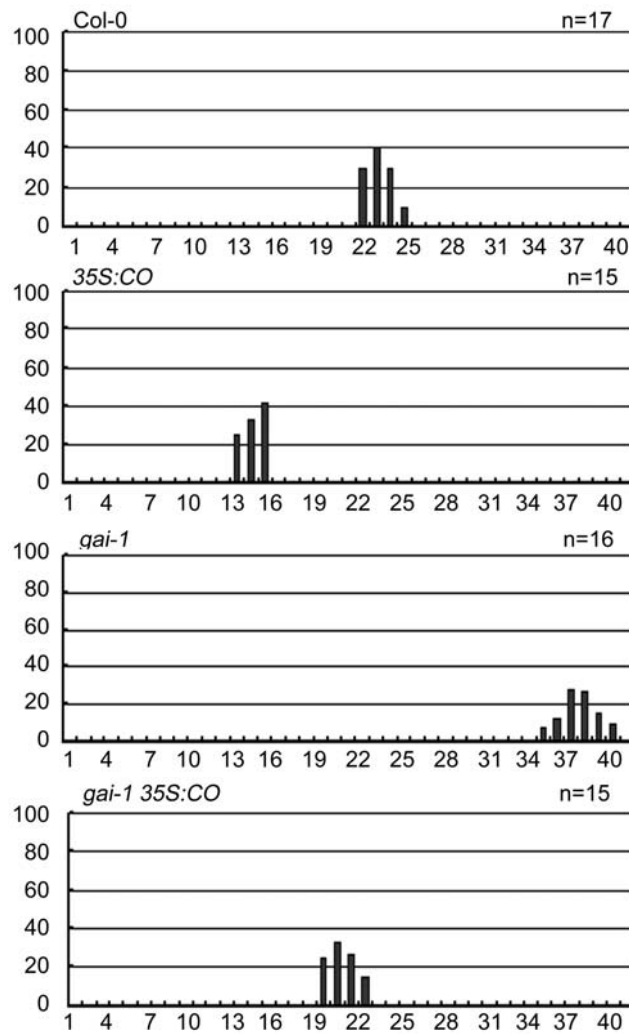

103

104 **Supplemental figure 7.** Flowering time of Col-0, 35S:CO, *gai-1*, and *gai-1*

105 35S:CO plants under LDs. The x axis indicates the number of days. The y axis

106 indicates the percentage of plants that flower with a given of days.

107

108

109

110

111

112

113

114

115

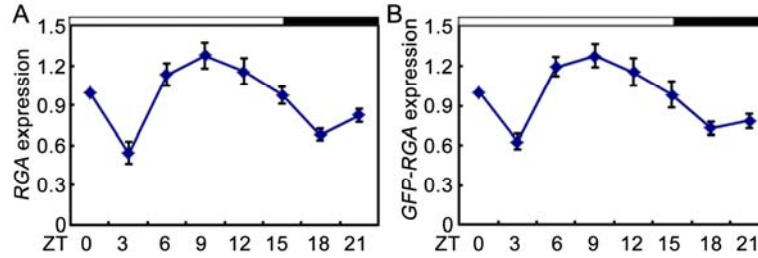

116

117 **Supplemental figure 8.** qRT-PCR of *RGA* and *GFP-RGA* expression. (A)  
118 qRT-PCR of *RGA* relative to *IPP2* under LDs. Total RNA was extracted from  
119 10-d-old Ler seedlings. (B) qRT-PCR of *GFP-RGA* relative to *IPP2* under LDs.  
120 Total RNA was extracted from homozygous *proRGA:GFP-RGA* transgenic  
121 plants. A *GFP-RGA*- specific primer was used to detect *GFP-RGA* transcripts.  
122 Error bars indicate SD from three independent RNA extracts.

123

124

125

126

127

128

129

130

131

132

133

134

135

136

137

138

139



140

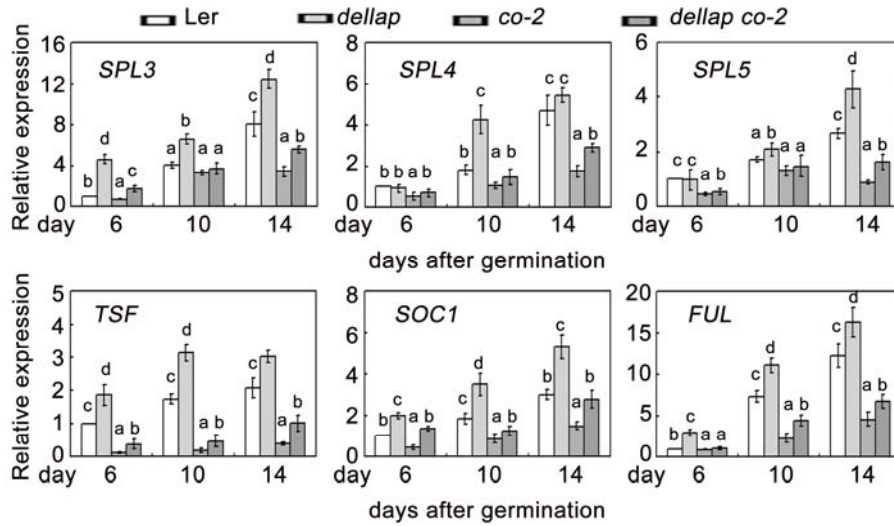

141

142 **Supplemental figure 9.** Expression of multiple flowering-related genes was  
143 co-regulated by DELLA and CO. The aerial part of Ler, *co-2*, *dellap*, and *dellap*  
144 *co-2* plants was collected at 6, 10, and 14 day after germination. The *ACTIN2*  
145 gene was used as an internal control. Error bars indicate SD from three  
146 independent RNA extracts. Different letters above columns indicate significant  
147 differences based on Tukey's test ( $P < 0.05$ ).

148

149

150

151

152

153

154

155

156

157

158

159

160

**Supplemental Table 1. Primers used in this study.**

| Use              | Gene name | Primers (5'->3')                                                                                                                                                                                                                                                                          |
|------------------|-----------|-------------------------------------------------------------------------------------------------------------------------------------------------------------------------------------------------------------------------------------------------------------------------------------------|
| qRT-PCR          | FT        | qFT-F: CTGGAACAACCTTTGGCAAT<br>qFT-R: TACTACTGTTTGCCTGCCAAG                                                                                                                                                                                                                               |
|                  | CO        | qCO-F: CTACAACGACAATGGTTCCATTAAC<br>qCO-R: CAGGGTCAGGTTGTTGC                                                                                                                                                                                                                              |
|                  | RGA       | qRGA-F: AACGCGTTTAAGCAAGCGAG<br>qRGA-R: GTTTCCAAGCGGAGGTGGTA                                                                                                                                                                                                                              |
|                  | GAI       | qGAI-F: TGGCTTGTGATGGACCTGAC<br>qGAI-R: AATATGTGCAGCCGCAAACC                                                                                                                                                                                                                              |
|                  | RGL1      | qRGL1-F: GAAACTTGGTCAGCTTGCG<br>qRGL1-R: GAAGACCGAGTTAACCGCCA                                                                                                                                                                                                                             |
|                  | RGL2      | qRGL2-F: TTTCGTCTCACCGAATCGG<br>qRGL2-R: TCCGATAAACTCTCAGCGGC                                                                                                                                                                                                                             |
|                  | RGL3      | qRGL3-F: TTCGACTCGCTCGAAGATGG<br>qRGL3-R: TCTCGTGTGCTCGATCCTA                                                                                                                                                                                                                             |
|                  | SOC1      | qSOC1-F: ACGAGAAGCTCTCTGAAAAG<br>qSOC1-R: GAACAAGGTAACCCAATGAAC                                                                                                                                                                                                                           |
|                  | TSF       | qTSF-F: GAGTCCAAGCAACCCTCACCA<br>qTSF-R: CACAATACGATGAATTCGCGAG                                                                                                                                                                                                                           |
|                  | SPL3      | qSPL3-F: CTCATGTTCCGGATCTCTGGTC<br>qSPL3-R: TTTCCGCCTTCTCTCGTTGTG                                                                                                                                                                                                                         |
|                  | SPL4      | qSPL4-F: CTCTCAGGACTTAACCAACGC<br>qSPL4-R: CAGAGCTCTTCTTCTTCGC                                                                                                                                                                                                                            |
|                  | SPL5      | qSPL5-F: AAGGCATCTGCTGCGACTGTTG<br>qSPL5-R: TCCTCCTCCTCTCATTGTGTCC                                                                                                                                                                                                                        |
|                  | FUL       | qFUL-F: TTGCAAGATCACAACAATTCGCTTCT<br>qFUL-R: GAGAGTTTGGTTCGTCACGACGAT                                                                                                                                                                                                                    |
|                  | IPP2      | qIPP2-F: GTATGAGTTGCTTCTCCAGCAAAG<br>qIPP2-R: GAGGATGGCTGCAACAAGTGT                                                                                                                                                                                                                       |
|                  | GFP-RGA   | qGFP-RGA-F: ATGGTCTGCTGGAGTTCTG<br>qGFP-RGA-R: ATGATGATGAAGAAGAAGTCCCG                                                                                                                                                                                                                    |
| Yeast Two Hybrid | CO        | BD-CO-CT-F: ATAG <u>AATT</u> CTATCTAAACCTTGTGGATTACAACCTC<br>BD-CO-CT-R: ATAG <u>GATCC</u> TCAGAATGAAGGAACAATCCCA                                                                                                                                                                         |
|                  | RGA       | AD-RGA-F: ATAC <u>CATAT</u> GATGAAGAGAGATCATCACCAATTCC<br>AD-RGA-R: ATAG <u>GATCC</u> GTACGCCGCCGTCGAGAGTT<br><br>AD-RGAd17: ATAC <u>CATAT</u> GATGAAGAGAGATCATCACCAATTCC<br>TTCAAAGCAACCTCGTCCATGTTACCTCCACCGTCTT<br>GAGGTTGCTTTGAAACTCGAACAAT<br>ATAG <u>GATCC</u> GTACGCCGCCGTCGAGAGTT |
|                  |           | AD-RGA-NT-F: ATAC <u>CATAT</u> GATGAAGAGAGATCATCACCAATTCC<br>AD-RGA-NT-R: ATAG <u>GATCC</u> GTTGTCGTTGGTGGTTGTCGTC                                                                                                                                                                        |
|                  |           | AD-RGA-CT-R: ATAC <u>CATAT</u> GACGGCGGCCGGTGAGTC<br>AD-RGA-NT-R: ATAG <u>GATCC</u> GTACGCCGCCGTCGAGAGTT                                                                                                                                                                                  |
|                  | GAI       | AD-GAI-F: ATAC <u>CATAT</u> GATGAAGAGAGATCATCATCATC<br>AD-GAI-R: ATAG <u>GATCC</u> CTAATTGGTGGAGAGTTTCCAAG                                                                                                                                                                                |

|                                   |               |                                                                                                                                                                                                                                                 |
|-----------------------------------|---------------|-------------------------------------------------------------------------------------------------------------------------------------------------------------------------------------------------------------------------------------------------|
|                                   | RGL2          | AD-RGL2-F: ATACATATGATGAAGAGAGGATACGGAGAAAACA<br>AD-RGL2-R: ATAAGATCTGAGTTTCCACGCCGAGGTT                                                                                                                                                        |
| <b>BiFC</b>                       | CO            | YN-CO-F: ATAGGATCCATGTTGAAACAAGAGAGTAACGACA<br>YN-CO-R: ATATCTAGAGAATGAAGGAACAATCCCATATC                                                                                                                                                        |
|                                   | RGA           | YC-RGA-F: ATATCTAGAATGAAGAGAGATCATCACCAATTCCA<br>YC-RGA-R: ATAGGATCCGTACGCCGCCGTCGAGAGTT                                                                                                                                                        |
|                                   | GAI           | YC-GAI-F: ATATCTAGAATGAAGAGAGATCATCATCATCATC<br>YC-GAI-R: ATAGGATCCCTAATTGGTGGAGAGTTTCCAAG                                                                                                                                                      |
|                                   | RGL1          | YC-RGL1-F: ATATCTAGAATGAAGAGAGAGCACAACCACC<br>YC-RGL1-R: ATAGGATCCTTATTCCACACGATTGATTTCGC                                                                                                                                                       |
|                                   | RGL2          | YC-RGL2-F: ATACCTAGGATGAAGAGAGGATACGGAGAAAACA<br>YC-RGL2-R: ATAAGATCTGAGTTTCCACGCCGAGGTT                                                                                                                                                        |
|                                   | RGL3          | YC-RGL3-F: ATACCTAGG ATGAAACGAAGCCATCAAGAAACG<br>YC-RGL3-R: ATAAGATCTCCGCAACTCCGCCCTAGT                                                                                                                                                         |
| <b>Co-IP</b>                      | CO            | Flag-CO-F: ATAGGATCCATGTTGAAACAAGAGAGTAACGACA<br>Flag -CO-R: ATATCTAGAGAATGAAGGAACAATCCCATATC                                                                                                                                                   |
|                                   | RGA           | myc-RGA-F: ATATCTAGAATGAAGAGAGATCATCACCAATTCCA<br>myc-RGA-R: ATAGGATCCGTACGCCGCCGTCGAGAGTT                                                                                                                                                      |
| <b>Transient expression assay</b> | FT            | pFT-F: ATAAAGCTTAGCTTTATGAGCTTAAACATATGCA<br>pFT-R: ATACCCGGGCTTTGATCTTGAACAAACAGGTGG                                                                                                                                                           |
|                                   | CO            | 35S:CO-F: ATATCTAGAATGTTGAAACAAGAGAGTAACGACA<br>35S:CO-R: ATAGGATCCTCAGAATGAAGGAACAATCCCA                                                                                                                                                       |
|                                   | RGA           | 35S:RGA-F: ATATCTAGAATGAAGAGAGATCATCACCAATTCCA<br>35S:RGA-R: ATAGGATCCTCAGTACGCCGCCGTCGAG                                                                                                                                                       |
|                                   | RGL1          | 35S:RGL1-F: ATATCTAGAATGAAGAGAGAGCACAACCACC<br>35S:RGL1-R: ATAGGATCCTTATTCCACACGATTGATTTCGC<br><br>35S:RGL1d17: ATATCTAGAATGAAGAGAGAGCACAACCACC<br>AACTCCGGCAGCTTCTTTTA<br>GCTGCCGGAGTTGACGTGGCACACAAGCTTGA<br>ATAGGATCCTTATTCCACACGATTGATTTCGC |
| <b>Transgenic Plants</b>          | CO            | 35S:CO-F: ATAGAGCTCATGTTGAAACAAGAGAGTAACGACA<br>35S:CO-R: ATAGGATCCGAATGAAGGAACAATCCCATATC                                                                                                                                                      |
|                                   | RGL1          | 35S:RGL1-F: ATA GAGCTCATGAAGAGAGAGCACAACCACC<br>35S:RGL1-R: ATAGGATCCTTCCACACGATTGATTTCGCC                                                                                                                                                      |
| <b>Pull-Down Assay</b>            | CO            | GST-CO-F: ATAGGATCCATGTTGAAACAAGAGAGTAACGACA<br>GST-CO-R: ATAGAATTCGAATGAAGGAACAATCCCATATC                                                                                                                                                      |
|                                   | RGA           | His-RGA-F: ATAGGATCCATGAAGAGAGATCATCACCAATTCCA<br>His-RGA-R: ATAGTCTGACTCAGTACGCCGCCGTCGAG                                                                                                                                                      |
| <b>Identification of mutants</b>  | <i>rga-t2</i> | 906F: GCCGGAGCTATGAGAAAAGTGG<br>DS3-2: CCGGTATATCCCGTTTTTCG<br>2076R: AAGAATTTTAAACAAGTGAACG<br>DS5-3: CGGTCCGTACGGGATTTTCC                                                                                                                     |
|                                   | <i>gai-t6</i> | N6: TAGAAGTGGTAGTGG<br>B34: ACGGTCCGTACGGGATTT<br>DL6: TTGCAGCAGCAATAACAGAGTCTAGC<br>DL71: CGTTACCGACCGTTTTTCATCCCTA                                                                                                                            |
|                                   | <i>rgl1-1</i> | 1670F: AAGCTAGCTCGAAACCCCAAAT<br>Ds5-P1: CATGGGCTGGGCTCAGTG<br>DS3-2: CCGGTATATCCCGTTTTTCG<br>2295R: CCACAGAGCGCGTAGAGGATAAC                                                                                                                    |

---

|  |        |                                                                                                                         |
|--|--------|-------------------------------------------------------------------------------------------------------------------------|
|  | rgl2-1 | 856F: GCTGGTGAACGCGTGGGAACA<br>DS3-2: CCGGTATATCCCGTTTTCG<br>1883R: ACGCCGAGGTTGTGATGAGTG<br>DS5-3: CGGTCGGTACGGGATTTCC |
|--|--------|-------------------------------------------------------------------------------------------------------------------------|

162
